# Supplementary material for: Perception of Radiation Risk as a Predictor of Mid-Term Mental Health after a Nuclear Disaster: The Fukushima Health Management Survey
Source: PubMed Central journal article supplement (PMC5615604; doi:10.3390/ijerph14091067), 2017-09-15
Supplement: ijerph-14-01067-s001.pdf [file ijerph-14-01067-s001.pdf]

**Figure S1.** Flow chart of the study selection.

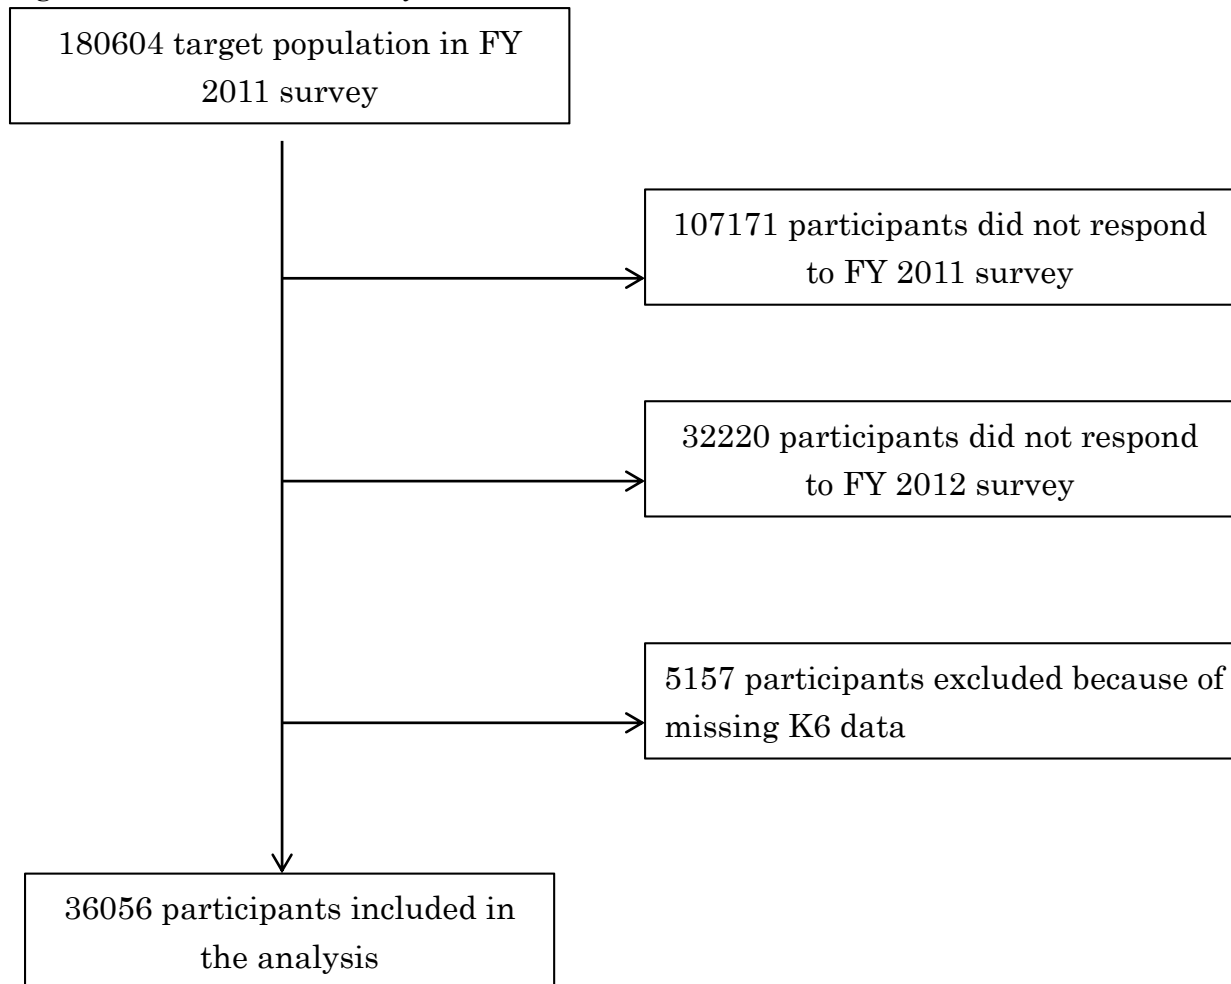

Table S1. Univariate and multivariate analysis by logistic regression in total subjects

|                          |                                                   | worsened (K6<13⇒K6≥13)<br>(Reference: resistant; K6<13⇒K6<13) |                          | recovered (K6≥13⇒K6<13)<br>(Reference: chronic; K6≥13⇒K6≥13) |                          |
|--------------------------|---------------------------------------------------|---------------------------------------------------------------|--------------------------|--------------------------------------------------------------|--------------------------|
|                          |                                                   | Univariate<br>analysis                                        | Multivariate<br>analysis | Univariate<br>analysis                                       | Multivariate<br>analysis |
|                          |                                                   | OR [95% CI]                                                   | OR [95% CI]              | OR [95% CI]                                                  | OR [95% CI]              |
| Age groups               | 15-39 years                                       | Reference                                                     | Reference                | Reference                                                    | Reference                |
|                          | 40-64 years                                       | 0.93(0.81-1.07)                                               | 0.79(0.68-0.91)          | 0.96(0.81-1.14)                                              | 0.95(0.79-1.14)          |
|                          | ≥65 years                                         | 1.14(0.99-1.31)                                               | 0.81(0.69-0.95)          | 0.91(0.77-1.09)                                              | 0.95(0.78-1.15)          |
| Subjective health status | Usual, good, or very good                         | Reference                                                     | Reference                | 1.96(1.73-2.23)                                              | 1.64(1.43-1.87)          |
|                          | Bad or very bad                                   | 3.68(3.28-4.12)                                               | 2.34(2.06-2.66)          | Reference                                                    | Reference                |
| Past history             | Cardiovascular disease (heart disease and stroke) | 1.61(1.40-1.86)                                               | 1.22(1.04-1.43)          | 0.85(0.72-0.99)                                              | 0.99(0.83-1.18)          |
|                          | Psychiatric disease                               | 3.82(3.19-4.57)                                               | 2.31(1.90-2.81)          | 0.47(0.39-0.55)                                              | 0.54(0.46-0.65)          |
| Disaster experiences     | Tsunami                                           | 1.33(1.18-1.50)                                               | 1.19(1.04-1.36)          | 1.09(0.95-1.26)                                              | 1.23(1.05-1.43)          |
|                          | heard the sound of nuclear plant explosion        | 1.69(1.52-1.88)                                               | 1.20(1.06-1.35)          | 0.88(0.77-1.01)                                              | 0.95(0.83-1.10)          |
|                          | bereavement                                       | 1.41(1.25-1.60)                                               | 1.03(0.90-1.18)          | 0.93(0.81-1.07)                                              | 0.99(0.86-1.15)          |
|                          | house damage                                      |                                                               |                          |                                                              |                          |

|                                   |                               |                 |                 |                 |                 |
|-----------------------------------|-------------------------------|-----------------|-----------------|-----------------|-----------------|
|                                   | No damage                     | Reference       | Reference       | Reference       | Reference       |
|                                   | Partial collapse              | 1.49(1.31-1.69) | 1.19(1.04-1.36) | 1.02(0.87-1.20) | 1.08(0.91-1.28) |
|                                   | Half collapse and worse       | 1.98(1.63-2.39) | 1.26(1.03-1.56) | 0.81(0.65-1.01) | 0.88(0.69-1.12) |
| Living place in 2011              | In Fukushima prefecture       | Reference       | Reference       | 1.20(1.04-1.40) | 1.11(0.95-1.30) |
|                                   | Out of Fukushima prefecture   | 1.28(1.13-1.45) | 1.06(0.92-1.21) | Reference       | Reference       |
| Living arrangement in 2011        | Own home                      | Reference       | Reference       | 1.34(1.15-1.56) | 1.19(1.01-1.41) |
|                                   | Other than own home           | 1.72(1.52-1.93) | 1.33(1.17-1.52) | Reference       | Reference       |
| Posttraumatic stress symptoms     | PCL-S score $\geq 44$ in 2011 | 5.65(5.05-6.32) | 3.63(3.21-4.12) | Reference       | Reference       |
|                                   | PCL-S score $< 44$ in 2011    | Reference       | Reference       | 1.90(1.64-2.21) | 1.62(1.38-1.90) |
| Radiation Risk Perception in 2011 | Immediate effect              |                 |                 |                 |                 |
|                                   | Very unlikely                 | Reference       | Reference       | Reference       | Reference       |
|                                   | Unlikely                      | 1.62(1.43-1.84) | 1.17(1.02-1.35) | 0.93(0.80-1.09) | 1.01(0.86-1.20) |
|                                   | Likely                        | 2.26(1.90-2.69) | 1.25(1.03-1.53) | 0.80(0.66-0.97) | 0.89(0.72-1.10) |
|                                   | Very likely                   | 2.77(2.29-3.36) | 1.25(0.99-1.57) | 0.76(0.63-0.91) | 0.91(0.73-1.13) |
|                                   | Delayed effect                |                 |                 |                 |                 |
|                                   | Very unlikely                 | Reference       | Reference       | Reference       | Reference       |
|                                   | Unlikely                      | 1.23(1.05-1.45) | 1.05(0.85-1.28) | 1.06(0.84-1.34) | 1.06(0.80-1.41) |
|                                   | Likely                        | 1.92(1.63-2.26) | 1.16(0.93-1.46) | 0.88(0.70-1.11) | 0.94(0.70-1.27) |
|                                   | Very likely                   | 2.59(2.21-3.03) | 1.11(0.86-1.42) | 0.80(0.65-0.99) | 1.01(0.74-1.39) |

Genetic effect

|               |                 |                 |                 |                 |
|---------------|-----------------|-----------------|-----------------|-----------------|
| Very unlikely | Reference       | Reference       | Reference       | Reference       |
| Unlikely      | 1.05(0.87-1.28) | 0.89(0.70-1.12) | 0.97(0.72-1.30) | 0.90(0.64-1.28) |
| Likely        | 1.60(1.33-1.93) | 1.07(0.84-1.37) | 1.01(0.77-1.34) | 1.09(0.77-1.55) |
| Very likely   | 2.51(2.11-2.98) | 1.28(1.00-1.66) | 0.77(0.60-1.00) | 0.91(0.64-1.29) |

---
